# Supplementary material
Source: PubMed Central journal article supplement (PMC3967038)
Supplement: supp_tpc.113.118075_tcp118075_SupplementalData.pdf [file supp_tpc.113.118075_tcp118075_SupplementalData.pdf]

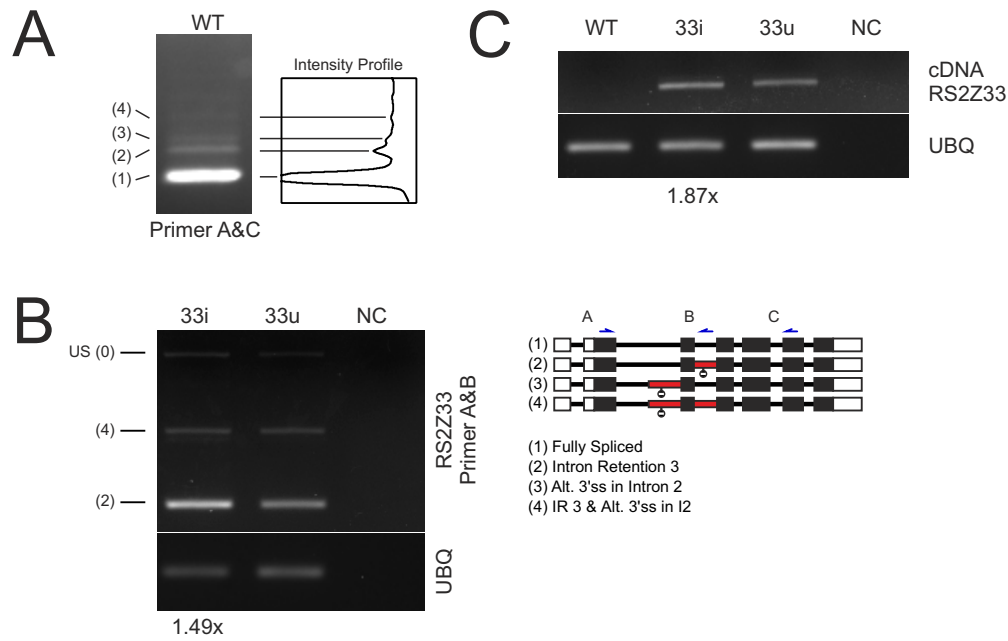

**Supplemental Figure 1:** Splice variants carrying intron retention 3 are upregulated in the induced RS2Z33 cell culture. A) Gel-separation of RT-PCR products of the RS2Z33 splice variants of untreated wildtype suspension cells with respective intensity profile (created with ImageJ). Splice variant 2 (intron retention 3) is the most abundant alternative splice variant in the cell suspension culture. B) Gel-separation of RT-PCR products of the RS2Z33 splice variants in fractionated cell extracts of induced and uninduced RS2Z33 inducible cell culture using an intron3-specific primer and one primer against exon 1. The induced population (33i) exhibits an upregulation of the intron 3 retaining transcript. WT - wildtype; 33i - induced RS2Z33 inducible suspension cell culture; 33u - uninduced population; NC - negative control (water); alt 3'ss in I2 & IR3 - transcripts carrying alternative 3' splice sites in intron 2 and a retained intron 3; US - unspliced transcript. Stop signs indicate the position of the PTCs. C) Gel-separation of RT-PCR product of RS2Z33 (At2g37340) using one vector-specific primer targeting the 35S minimal promoter and a primer specific to exon 4 of RS2Z33. Comparison of the wild type cell culture (col-0) and the beta-estradiol inducible cell culture with integrated RS2Z33-3'HA (full CDS). The induced cell population shows higher expression of the transgene than the uninduced population (33i vs. 33u).

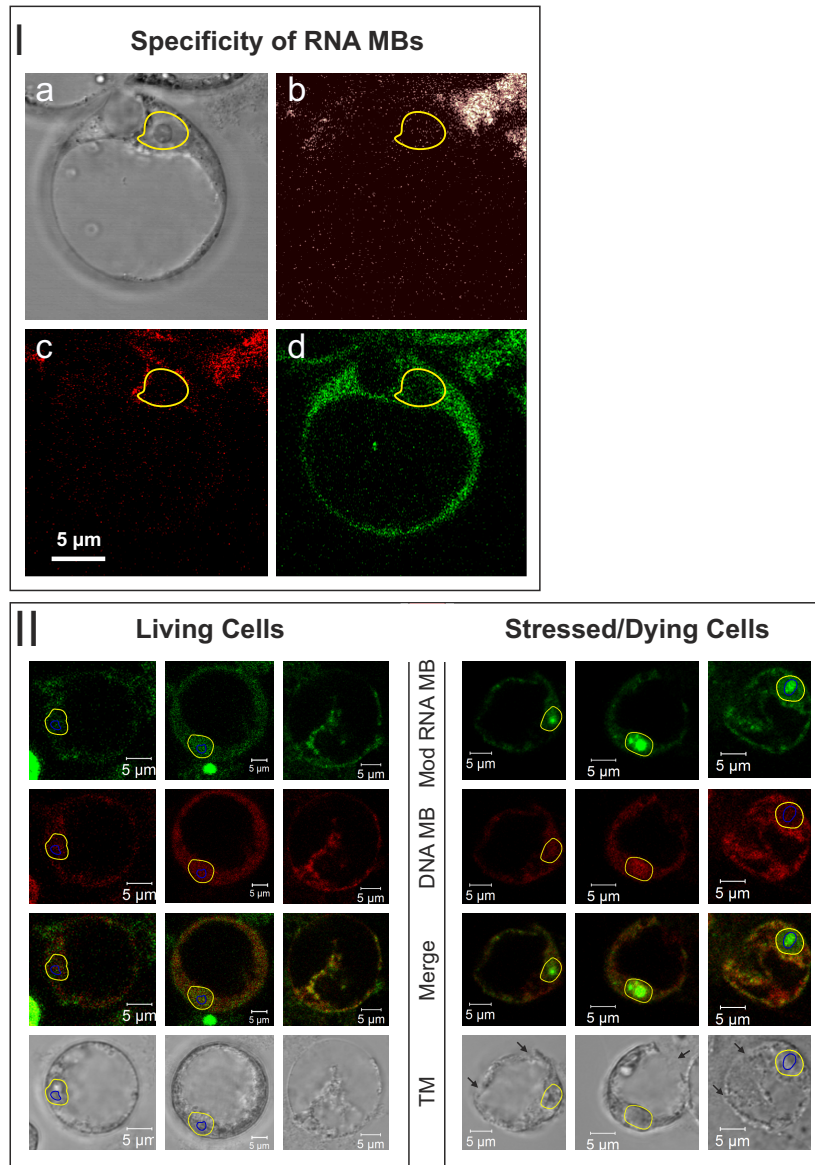

**Supplemental Figure 2:** I) Localization of 2'-O-methylated MBs in comparison with a scrambled DNA MB. Representative image of a protoplast transfected with a 2'-O-methylated RNA MB labeled with an Atto550 fluorophore targeting exon 3 of the SEF factor (cells cotransfected with a FAM labeled scrambled DNA MB). a) Transmission image with visible nucleus (marked yellow). b) Cell autofluorescence at 633 nm illumination. c) The scrambled DNA MB signal. d) The specific 2'-O-methylated MB signal targeting exon 3. II) Localization of 2'-O-methylated RNA MBs in comparison with a DNA MB (same sequence). Image of protoplasts cotransfected with a 2'-O-methylated RNA MB labeled with an Atto550 fluorophore and a DNA MB with an Atto647N fluorophore both targeting exon 3 of the SEF factor. Green channel: 2'-O-methylated RNA MB; Red channel: DNA MB; Merge of the two channels; Transmission image (nucleus yellow, nucleolus blue). The panel shows 3 examples for living cells and 3 examples for stressed or dying cells. Black arrows indicate holes within the cellular membrane. The nuclear and the prominent nucleolar accumulation of the 2'-O-methylated RNA MBs is clearly visible within dying cells, whereas this localization is not observable for the DNA MBs. Healthy and transfected cells show similar distribution of the 2'-O-methylated RNA MB and the DNA MB.

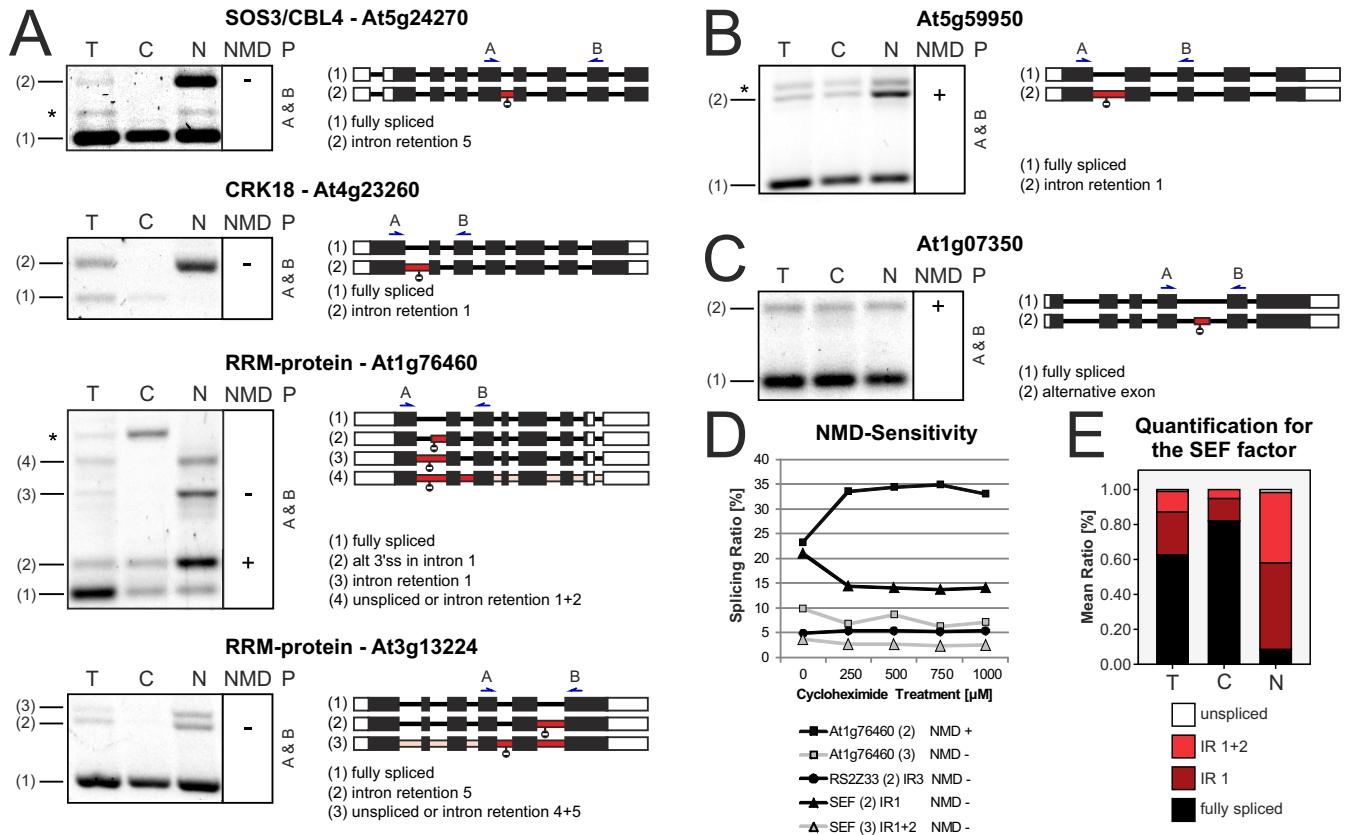

**Supplemental Figure 3:** Splice variants carrying NMD-negative but PTC+ intron retentions are present within the nuclear fraction. A) Gel-separation of RT-PCR products of At5g24270, At4g23260, At1g76460 and At3g13224 in fractionated cell extracts using the indicated primer pairs A&B. All tested NMD-negative transcripts with intron retention events are present within the nuclear fraction. However, NMD-positive transcripts as the alternative mRNA with 3'ss in intron1 of At1g76460 are also present within the cytoplasm. Stop signs indicate the position of the PTCs. B) Gel-separation of RT-PCR products of At5g59950 in fractionated cell extracts using the indicated primer pair A&B. The second transcript is the only known NMD-positive intron retention event and is present within the cytoplasm as well as the nucleus. C) Gel-separation of RT-PCR products of At1g07350 in fractionated cell extracts using the indicated primer pair A&B. The second transcript is a typical NMD-positive transcript present within the cytoplasm as well as the nucleus. D) Quantitative analysis of one NMD-sensitive splice variant and four NMD-insensitive splice variants upon treatment with a rising concentration of cycloheximide (inhibitor of NMD,  $9e^{06}$  protoplasts were incubated in the dark at RT for 4h, 2 biological replicates, 2 technical reproductions). The experiment included gel-separation of the RT-PCR products of each investigated gene [oligo-dT oligonucleotides] and a subsequent quantitative gel analysis of the splicing ratios via ImageJ. The positive control increases from 23% to approximately 35%, whereas all tested NMD-insensitive splice variants did not accumulate. E) A quantitative analysis of the respective gel of the SEF factor. Quantification was performed via TotalLab Quant program. Each band was normalized to the total lane signal, yielding the ratio of a splice-variant per fraction. alt 3'ss -alternative 3' splice sites, T - total fraction, C - cytoplasmic fraction, N - nuclear fraction, NMD - indicates the sensitivity to the nonsense-mediated decay, P - primer pair, IR - intron retention, black boxes - exons, white boxes - untranslated regions, red - retained intronic sequences.

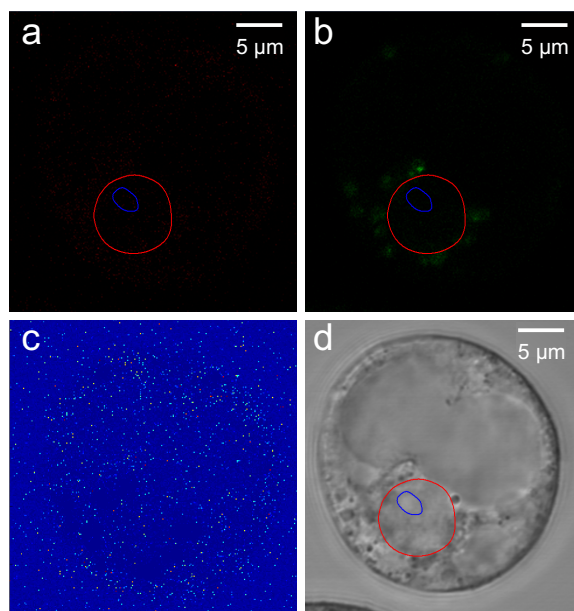

**Supplemental Figure 4:** The autofluorescence of wild type cells in the relevant channels. A representative image of a protoplast transfected with water. a) Autofluorescence at excitation of 561 (emission filters at 566-635). b) Autofluorescence at excitation 488 nm illumination (emission filters at 492-570). Autofluorescence is detectable within the perinuclear region, probable arising from plastid accumulation. c) Ratiometric image. d) Transmission image with visible nucleus (marked red) and nucleolus (marked blue).

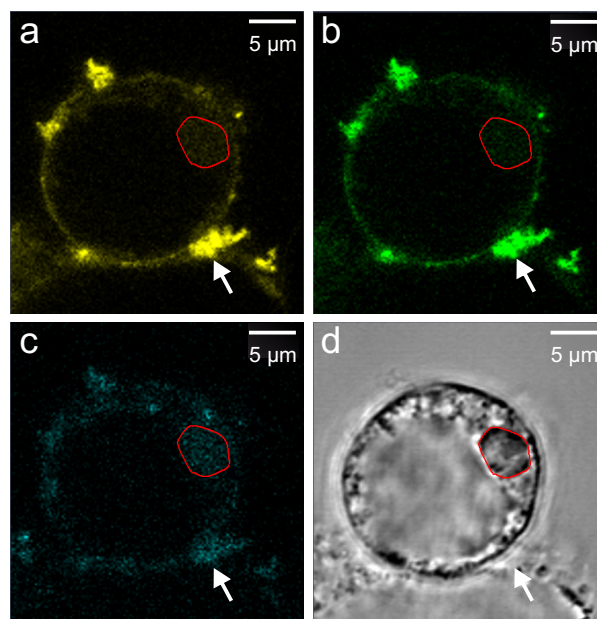

**Supplemental Figure 5:** Distribution of MBs within transfected cells. Shown is the localization of a dual-labeled MB (FAM at the 3end and Atto550 at the 5 end) targeting exon 3 of the SEF factor within a representative protoplast (uninduced RS2Z33 overexpresser line). a) The Att0550 signal (i.e. 561nm illumination, filters at 566-635). b) The FAM signal (488nm illumination, filters at 492-570). c) The FRET signal (488nm illumination, filters at 577-635). d) Transmission white light image with visible nucleus (marked red). The arrows mark extracellular debris.

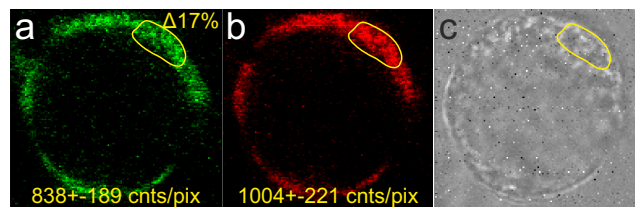

**Supplemental Figure 6:** Correction for quenching efficiency and quantum yields. a) Fluorescence image of the FAM/BHQ1-labeled MB after the correction of the excitation. b) Image of the Atto555/BHQ2-labeled MB. The image in a) is 17% darker than b), this corresponds to the difference in quenching efficiencies and quantum yields.

**Supplemental Table 1.** GO Biological Process classification of genes with NMD-insensitive IR events

| gene      | GO Biological Process                                                                                                                                                                                                                                                                                                                                                                                                                                                                                                                                                                          |
|-----------|------------------------------------------------------------------------------------------------------------------------------------------------------------------------------------------------------------------------------------------------------------------------------------------------------------------------------------------------------------------------------------------------------------------------------------------------------------------------------------------------------------------------------------------------------------------------------------------------|
| At5g37055 | Chromatin remodeling<br>defense response to bacterium<br>regulation of developmental growth<br>regulation of flower development                                                                                                                                                                                                                                                                                                                                                                                                                                                                |
| AT4G23260 | maltose metabolic process<br>response to abscisic acid stimulus<br>starch biosynthetic process                                                                                                                                                                                                                                                                                                                                                                                                                                                                                                 |
| At5g24270 | calcium -mediated signaling<br>cellular potassium ion homeostasis<br>detection of calcium ion<br>hypotonic salinity response<br>stomatal movement                                                                                                                                                                                                                                                                                                                                                                                                                                              |
| AT3G13224 | NA                                                                                                                                                                                                                                                                                                                                                                                                                                                                                                                                                                                             |
| At1g76460 | photoperiodism, flowering                                                                                                                                                                                                                                                                                                                                                                                                                                                                                                                                                                      |
| AT2G28550 | organ morphogenesis regulation of transcription, DNA -dependent<br>response to abscisic acid stimulus<br>response to salt stress<br>vegetative to reproductive phase transition of meristem                                                                                                                                                                                                                                                                                                                                                                                                    |
| At3g16800 | NA                                                                                                                                                                                                                                                                                                                                                                                                                                                                                                                                                                                             |
| At5g13790 | callose deposition in cell wall<br>cellular membrane fusion<br>cellular response to auxin stimulus<br>embryo development ending in seed dormancy<br>fruit abscission<br>fruit dehiscence<br>gibberellin catabolic process<br>microsporogenesis<br>negative regulation of floral organ abscission<br>negative regulation of flower development<br>negative regulation of seed maturation<br>negative regulation of short -day photoperiodism, flowering<br>ovule development positive regulation of transcription, DNA -dependent<br>somatic embryogenesis negative regulation of transcription |
| At5g25610 | response to abscisic acid stimulus<br>response to cold<br>response to desiccation<br>response to salt stress                                                                                                                                                                                                                                                                                                                                                                                                                                                                                   |
| At1g49730 | NA                                                                                                                                                                                                                                                                                                                                                                                                                                                                                                                                                                                             |
| At4g27410 | abscisic acid mediated signaling pathway<br>hyperosmotic salinity response<br>positive regulation of transcription, DNA -dependent<br>response to abscisic acid stimulus<br>response to auxin stimulus<br>response to cold<br>response to ethylene stimulus<br>response to jasmonic acid stimulus<br>response to water deprivation<br>response to wounding signal transduction                                                                                                                                                                                                                 |

**Supplemental Table 2.** Sequences of the oligonucleotides and Molecular Beacons.

## Oligonucleotide sequences used for RT-PCR

| Name                | Sequence                        |
|---------------------|---------------------------------|
| RS2Z33-exon 5 rev   | 5'-TAGCTTCGGCTACGGCTAAGACTC-3'  |
| RS2Z33-exon 2 fw    | 5'-GACAATGCCTCGCTATGATGATCG-3'  |
| RS2Z33-alt 3'ss fw  | 5'-CTTTTTAGCAGATACGGAAGGTCTC-3' |
| RS2Z33-intron 3 rev | 5'-GGACAAAAGAGACCACATGCATGG-3'  |
| SEF_exon 1 fw       | 5'-GGAAGAGATGTGCAACCGTCG-3'     |
| SEF_exon 4 rev      | 5'-GCTGCTTTCAAGTAAGTCGG-3'      |
| At1g07350           | 5'-CCTTGTCTGGACCCATGGAC-3'      |
|                     | 5'-CTCGAGCAGTTCTCAGCCCC-3'      |
| At5g24270           | 5'-GAGTTTGGTGAATTTGTCCGG-3'     |
|                     | 5'-GGCAAAGTCATGTTCTTGATG-3'     |
| At1g76460           | 5'-GGTCGATCCAAAGGATATGG-3'      |
|                     | 5'-GGAAGTGGTTGCTGATACGG-3'      |
| AT4G23260           | 5'-GGGAAGTGTATCCCTTCTCTGG-3'    |
|                     | 5'-GATTTCTCTTCGTAGGATCAAAG-3'   |
| AT3G13224           | 5'-GGGTGACTACCGTAAGAAGG-3'      |
|                     | 5'-GGCGCTAGTCCTGGGAAAA-3'       |
| At5g59950           | 5'-CTGCTCCATACCAATCAGCC-3'      |
|                     | 5'-CCAATTCTATCAAATGAAC-3'       |
| pMDC7-RS2Z33-HA     | 5'-GACACGCTGAAGCTAGTCG-3'       |
|                     | 5'-GGTGATGGTGGTGGGCTCCC-3'      |

## Sequences of the Molecular Beacons

| Name         | Sequence                                    |
|--------------|---------------------------------------------|
| 33mRNA_EJ6   | 5'-GATCGCGGTGATCGGCTGTAGCTTCGGCCGCGATC -3'  |
| 33alt_EJ     | 5'-GATCGCGCCAGAGACCTCCGTATCTGCCGCGATC -3'   |
| 33alt_intron | 5'-GATCGCGCATGCATGGTGTGTTTTCCACCGCGATC -3'  |
| Cat3/1       | 5'-GATCGCGAGGACTGGCACGTTCTGGACACGCGATC -3'  |
| SEF_IR2      | 5'- GATCGCGCTACAGATTCACACACAGAGCCGCGATC -3' |
| SEF_IR3      | 5'- GATCGCGCCTAGCCGAAAATAGTTAGCGCGATC -3'   |
| SEF_EJ1      | 5'- GATCGCGGCTATAGCAGCCTGAGTTCGACGCGATC -3' |
| SEF_exon3    | 5'- GATCGCGGCTTTGATCCTTTGTGTTGCCGCGATC -3'  |
| Scramble     | 5'- GTACGCGGATGCGCGTACGACGTCTGAGACGCGTAC-3' |
| Scramble2    | 5'- GGCGTACGAGCGGTAATTCTGGCAAGCGAGTACGCC-3' |
